# Supplementary material
Source: PubMed Central journal article supplement (PMC2276369)

## SUPPLEMENTAL MATERIAL

**Fig. S1.** ClustalX alignment of Sav1866-dimer vs human SUR1 (in bold).

**Fig. S2.** A cross-eye stereo view of the 2ONJ.pdb-based SUR1<sub>Q1178R</sub> core with 2 molecules of the ATP analogue AMP-PNP (the CPK sticks) and 2 Mg<sup>2+</sup> ions (the gray balls in place of Na<sup>+</sup> in 2ONJ.pdb). There is no structural template to build the long loop (residues 934-989) connecting the halves of the core. The TMD1-NBD1-half of the core is shown as the lime tube. The TMD2-NBD2-half is shown in cyan tubes, except for the TM15, Coupling, TM16, and TM17 helices, which are shown as ribbons. The R1178 in TM15 is shown in red sticks. Residues within 0.34 nm (the resolution of the template structure) from the R1178 are shown in van der Waals spheres (M1251 in TM16; L1294, M1297, V1298, and L1301 in TM17). The conserved ‘coupling’ or ‘transmission’ helix (S1,S2) from one half of the core interacts with the nucleotide-bound NBD from the other half of the core, so mutations stabilizing the ‘outward-facing’ orientation of the last three TM helices from one TMD (for example, TM15, 16, 17) might stabilize the core in its ‘open’ (stimulatory) conformation with the Mg-nucleotide-bound NBD1/NBD2-dimer. The S1237 (the royal blue vdW spheres) which specifies the sulfonylurea-inhibition of K<sub>ATP</sub> channels maps to the TM16 helix, not ‘a loop’ (S3), further indicating the key role of the TM15-16 helical ‘transmission-pedal’ in the ligand-dependent gating of K<sub>ATP</sub> channels. We hypothesized that sulfonylurea-binding to the TM16 destabilizes, whereas the R1178 in the TM15 overstabilizes the Mg-nucleotide-bound conformation of the core with the open TM domains; that, respectively, destabilizes and overstabilizes the open state of the K<sub>ATP</sub> pore. There is no structural template to model the N-terminal portion of SUR1 (TMD0-L0 gatekeeper) that associates with K<sub>IR6.2</sub> and bidirectionally controls its gating dynamics (S4).

**Fig. S3.** Currents through single NDSUR1 vs WT K<sub>ATP</sub> channels in the ligand-free solution, recorded in inside-out patches as described in Experimental Procedures. The mutation does not affect the unitary current amplitude or the ligand-independent activity; the unitary conductance,  $P_{Omax}$ , mean open, fast closed, burst, and interburst times at the burst criterion of 2 ms were 74±3 vs 74±2 pS, 0.646±0.051 vs 0.671±0.042, 2.99±0.31 vs 3.01±0.27, 0.29±0.03 vs 0.28±0.04, 119.42±23.72 vs 124.83±25.35, and 49.11±6.48 vs 45.14±5.82 ms for 6 NDSUR1 vs 6 WT channels, respectively.

**Table S1.** Concatemeric K<sub>ATP</sub> channels with all possible numbers of NDSUR1 vs SUR1 subunits show similar ligand-independent activity. The activities of the concatemeric K<sub>ATP</sub> channels were independent of whether K<sub>IR6.2</sub> subunits were from one or more concatemer(s) or how many receptors of the same kind were from concatemer(s) because SUR1-K<sub>IR6.2</sub>-K<sub>IR6.2</sub>-K<sub>IR6.2</sub>-K<sub>IR6.2</sub>/SUR1<sub>3</sub> vs (SUR1-K<sub>IR6.2</sub>-K<sub>IR6.2</sub>)<sub>2</sub>/SUR1<sub>2</sub> vs (SUR1-K<sub>IR6.2</sub>)<sub>4</sub> vs K<sub>IR6.2</sub>-K<sub>IR6.2</sub>-K<sub>IR6.2</sub>-K<sub>IR6.2</sub>/SUR1<sub>4</sub> vs (K<sub>IR6.2</sub>-K<sub>IR6.2</sub>)<sub>2</sub>/SUR1<sub>4</sub> channels were similarly active, and (SUR1-K<sub>IR6.2</sub>-K<sub>IR6.2</sub>)<sub>2</sub>/NDSUR1<sub>2</sub> vs (NDSUR1-K<sub>IR6.2</sub>-K<sub>IR6.2</sub>)<sub>2</sub>/SUR1<sub>2</sub> channels were undistinguishable. Sixteen single-channel records from heterozygous cells expressing non-concatenated NDSUR1, SUR1, and K<sub>IR6.2</sub> showed similar  $i$ , the WT channel-like  $P_{Omax}$ , and similar response to 10 μM ATP (>50% inhibition), but at least three dissimilar  $P_O$  in millimolar MgATP (differing >2.5-fold from each other), suggesting that the randomly interacting monomeric subunits readily form K<sub>ATP</sub> species containing both receptors and that ‘intermediate’ hyperstimulation of concatemeric channels containing both receptors (Fig. 2A,B) is physiologically relevant.

| Channel                                                                      | Mean open time (ms) | Mean fast closed time (ms) | Mean burst duration (ms) | Mean interburst interval (ms) | $P_{Omax}$    |
|------------------------------------------------------------------------------|---------------------|----------------------------|--------------------------|-------------------------------|---------------|
| SUR1-(K <sub>IR6.2</sub> ) <sub>4</sub> /SUR1 <sub>3</sub>                   | 3.04 ± 0.31         | 0.28 ± 0.03                | 375.51 ± 42.28           | 22.21 ± 3.37                  | 0.865 ± 0.018 |
| NDSUR1-(K <sub>IR6.2</sub> ) <sub>4</sub> /SUR1 <sub>3</sub>                 | 3.06 ± 0.29         | 0.28 ± 0.03                | 380.34 ± 36.26           | 24.22 ± 4.02                  | 0.862 ± 0.021 |
| [SUR1-(K <sub>IR6.2</sub> ) <sub>2</sub> ] <sub>2</sub> /NDSUR1 <sub>2</sub> | 3.05 ± 0.28         | 0.27 ± 0.02                | 372.79 ± 31.29           | 25.05 ± 3.88                  | 0.861 ± 0.017 |
| SUR1-(K <sub>IR6.2</sub> ) <sub>4</sub> /NDSUR1 <sub>3</sub>                 | 3.04 ± 0.26         | 0.27 ± 0.03                | 401.96 ± 35.44           | 28.02 ± 4.11                  | 0.858 ± 0.019 |
| NDSUR1-(K <sub>IR6.2</sub> ) <sub>4</sub> /NDSUR1 <sub>3</sub>               | 3.01 ± 0.29         | 0.29 ± 0.03                | 360.37 ± 20.35           | 20.86 ± 4.07                  | 0.863 ± 0.022 |

## References

- S1. Dawson, R. J., and Locher, K. P. (2006) *Nature* **443**, 180-185
- S2. Dawson, R. J., and Locher, K. P. (2007) *FEBS Lett* **581**, 935-938
- S3. Ashfield, R., Gribble, F. M., Ashcroft, S. J., and Ashcroft, F. M. (1999) *Diabetes* **48**, 1341-1347
- S4. Babenko, A. P., and Bryan, J. (2003) *J Biol Chem* **278**, 41577-41580

Fig. S1

-----  
MPLAFCGSENHSAAYRVDQGVLNNGCFVDALNVVPHVFLLFITFPILFIGWGSQSSKVHIHHSWLHFPGHNLRWILTFM 80  
-----  
LLFVLVCEIAEGILSDGVTESHHLHLYMPAGMAFMAAVTSVVYHNIETSNFPKLLIALLVYWTLAFITKTIKFKLLDH 160  
-----  
AIGFSQLRFCLTGLLVILYGMLLLVEVNVIRVRYIFFKTPREVKPPEDLQDLGVRFLQPFVNLPSKGTYWWMNAFIKTA 240  
-----  
-----MIKRYLQFVKPKYRIFATIIVGIKFGIPMLIPLLI  
HKKPIDLRAIGKLPVMRALTNYQRLCEAFDAQVRKDIQGTQGARAIWQALSHAFGRRLVLSSTFRILADLLGFAGPLCI 320  
-----  
KYAIDGVINN-----HALTTDEKVHHLTIAIGIALFIFVIVRPPIEFIRQYLAQWTSNKILYDIRKKLYNHLQ  
FGIVDHLGKENDVFPKTFQFLGVYFVSSQEFLANAYVLAVLLFLALLLQRTFLQASYVVAIETGINLRGAIQTKIYNKIM 400  
-----  
ALSAR--FYANNQVGQVISRVINDVEQTKDFILTGLMNIWDCITIIIALSIMFFLDVKLTLAALFIFPFYILTVYVFFG  
HLSTSNLSMGEMTAGQICNLVAIDTNQLMWFFFLCPN-LWAMPVQIIVGVILLYYILGVSALIGAAVILLAPVQYFVAT 479  
-----  
RLRKLTRERSQALAEVQGFLEHERVQGISVVKSFADIEDNEAKNFDKKNNTNFLTRALKHTRWNAYSFAAINTVTDIGPIIVI  
KLSQAQRSTLEYSNERLKQTNEMLRGIKLLKLYAWENIFRTRVETTRKEMTSLRAFAYTSSISIFMNTAIPAAVLTIF 553  
-----  
GVGAYLAISGSITVGTAAAFVGYLELLFGPLRRLVASFTTTLTQSFASMDRVFQLIDEDYDIKNGVG-----  
VGHVSFFKEADFSVAFASLSLFHILVTPFLFLLSSVVRSTVKALVSVQKLEFLSSAEIREEQCAPHEPTQGPASKYQ 639  
-----  
AQPIEIKQGR-----IDIDHVSFYNDNEAPILKDINLSIEKGETVAFVGMSSGGK  
AVPLRVVNRKRPAREDRCGLTGPLQSLVPSADGDADNCCVQIMGGYFTWTPDGIPTLNITIRIPRGLTMIVGQVCGCK 719  
-----  
STLINLIPRFYDVTSGQILIDGHNIKDFLTG-----SLRNQIGLVQQDNILFSDTVKENILLGRPTATDEEV  
SSLLLAALGEMQKVSQAVFWSSLPDSEIGEDPSPERETATDLDIRKRGPVAYASQKPWLLNATVEENIIFESP-FNKQRY 798  
-----  
VEAAKMANAHDFIMNLPQGYDTEVGERGVKLSGGQKQRLSIARIFLNNPILILDEATSALDLESESI IQEA--LDVLSK  
KMVIEACSLQPDIDILPHGDQTQIGERGINLSGGQRQRI SVARALYQHANVVFLDDPF SLDIHLSDHLMQAGILELLRD 878  
-----  
D-RTTLIVAHRLSTITHADKIVVIENGHIVETGTHRELIKQG-AYEHLYSIQNL-----  
DKRTVVLVTHKLQYLPHADWIIAMKDGTIQREGTLKDFQRSECQLFEHWKTLMNRQDQELEKETVTERKATEPPQGLSRA 958  
-----  
-----MIKRYLQFVKPKYR-----IFATIIVGIKFGIPMLIPLLIK  
MSSRDGLLQDEEEEEEEAAESEDDNLSMHLQRAEIPWRACAKYLSAGILLLSLLVFSQLLKHMVLVAIDYWLAKWTD 1038  
-----  
YAIDGVINNHALTTDEKVHHLTIAIGIALFIFVIVRPPIEFIRQYLAQWTSNKILYDIRKKLYNHLQALSARFYANNQVG  
SALTTPAARNCSLSQECTLDQTVYAMVFTVLCSLGIVLCLVTSVTEWVTGLKVAKRLHRSLLNRIILAPMRFFETPLG 1118  
-----  
QVISRVINDVEQTKDFILTGLMNIWDCITIIIALSIMFFLDVKLTLAALFIFPFYILTVYVFFGRLRKLTRERSQALAE  
SILNRFSSDCNTIDQHIPSTLECLSRSTLLCVSALAVISYVTPVFLVALLPLAVVCYFIQKYFRVASRDLQQLDDTTQLP 1198  
-----  
VQGFLEHERVQGISVVKSFADIEDNEAKNFDKKNNTNFLTRALKHTRWNAYSFAAINTVTDIGPIIVIGVAYLAISGSITVG  
LLSHFAETVEGLTTIRAFRYEARFQKLELEYTDSNNIASLFLTAANRWLEVRMEYIGACVVLIAAVTSSISNSLHRELSAG 1278  
-----  
TLAAFVGYLELLFGPLRRLVASFTTTLTQSFASMDRVFQLIDEDYDIKNGVGAQPIEIK---QGRIDHVSFYNDNEA  
LVGLGLTYALMVSNYLNMVVRNLADMELQLGAVKRIHGLLKTEAESYEGLLAPSLIPKNWPDQKIQIQNL SVRYDSSLK 1358  
-----  
PILKDINLSIEKGETVAFVGMSSGGKSTLINLIPRFYDVTSGQILIDGHNIKDFLTGSLRNQIGLVQQDNILFSDTVKEN  
PVLKHNALISPGQKIGICGRTSGSKSFSLAFRMDVTFEGHIIIDGIDIRKLPHTLPSRSLIILQDPVLFSGTIRFN 1438  
-----  
ILLGRPTATDEEVVEAAKMANAHDFIMNLPQGYDTEVGERGVKLSGGQKQRLSIARIFLNNPILILDEATSALDLESES  
LDPER-KCSDSTLWEALEIAQLKLVKALPGGLDAIITEGGENFSQGRQLFCLARAFVRKTSIFIMDEATASIDMATEN 1517  
-----  
IIQEA LDVLSKDRTTLIVAHRLSTITHADKIVVIENGHIVETGTHRELIKQGAYEHLYSIQNL  
ILQKVVMTAFADRVTVVTIAHRVHTILSADLVIVLKRGAILEFDKPEKLLSRKDSVFASFVRADK 1581

Fig. S2

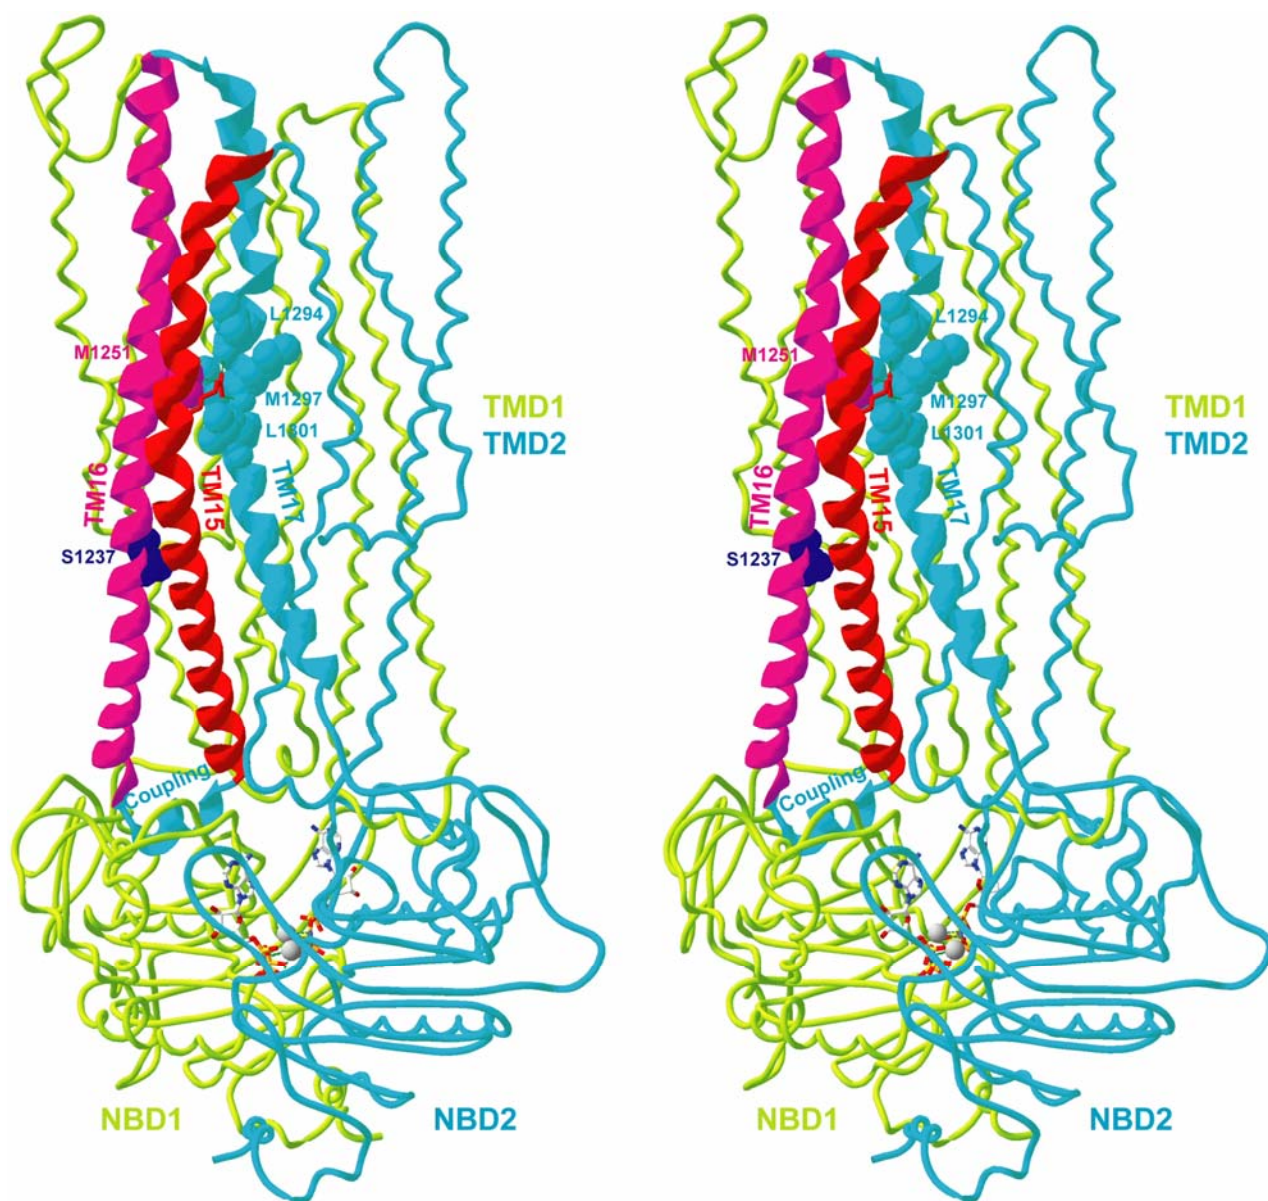

**Fig. S3**

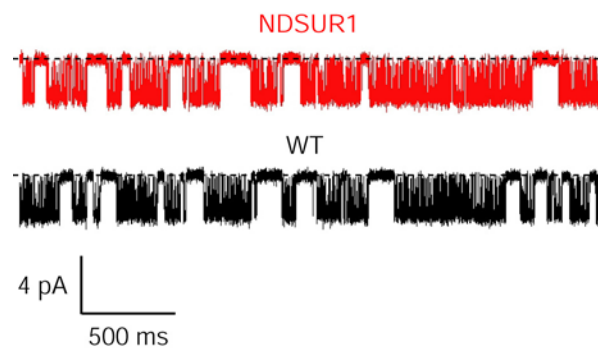

Supplement: jbc_C700243200_1.pdf [file jbc_C700243200_1.pdf]
